# Supplementary material for: Ultralow lattice thermal conductivity of binary compounds A2B (A = Cs, Rb & B = Se, Te) with higher-order anharmonicity correction
Source: Royal Society of Chemistry journal article supplement (doi:10.1039/d2cp05542b), 2023-01-01
Supplement: d2cp05542b1.pdf [file d2cp05542b1.pdf]

# Ultralow Lattice Thermal Conductivity of Binary Compounds $A_2B$ (A=Cs, Rb & B=Se, Te) with Higher-Order Anharmonicity Correction

Shuming Zeng,<sup>1</sup> Lei Fang,<sup>1</sup> Yusong Tu,<sup>1</sup> M. Zulfiqar,<sup>2</sup> and Geng Li<sup>3</sup>

<sup>1</sup>*College of Physics Science and Technology,  
Yangzhou University, Jiangsu 225009, P. R. China\**

<sup>2</sup>*Department of Physics, University of Sargodha, 40100 Sargodha, Pakistan<sup>†</sup>*

<sup>3</sup>*School of Materials Science and Engineering,  
National Institute for Advanced Materials, Nankai University,  
Tongyan Road 38, Tianjin 300350, P. R. China<sup>‡</sup>*

(Dated: March 3, 2023)

---

\* zengsm@yzu.edu.cn

† muhammad.zulfiqar@uos.edu.pk

‡ ligeng@nsc-tj.cn

TABLE SI. The interatomic distances of the symmetrically independent atoms in the binary compounds  $A_2B$  ( $A=Cs, Rb$  &  $B=Se, Te$ ). In the  $A_2B$  system, there are three unequal atoms, denoted by A1, A2 and B1, whose coordinates are (0.0, 0.0, 0.0), (0.333, 0.667, 0.250) and (0.333, 0.667, 0.750), respectively. The distances between A1 and A2, A1 and B1 and A2 and B1 are denoted by  $d_{12}$ ,  $d_{13}$  and  $d_{23}$  respectively.

| Material | $d_{12}$ | $d_{13}$ | $d_{23}$ |
|----------|----------|----------|----------|
| $Cs_2Se$ | 3.942    | 3.942    | 3.425    |
| $Cs_2Te$ | 4.155    | 4.155    | 3.628    |
| $Rb_2Se$ | 3.779    | 3.779    | 3.276    |
| $Rb_2Te$ | 3.995    | 3.995    | 3.480    |

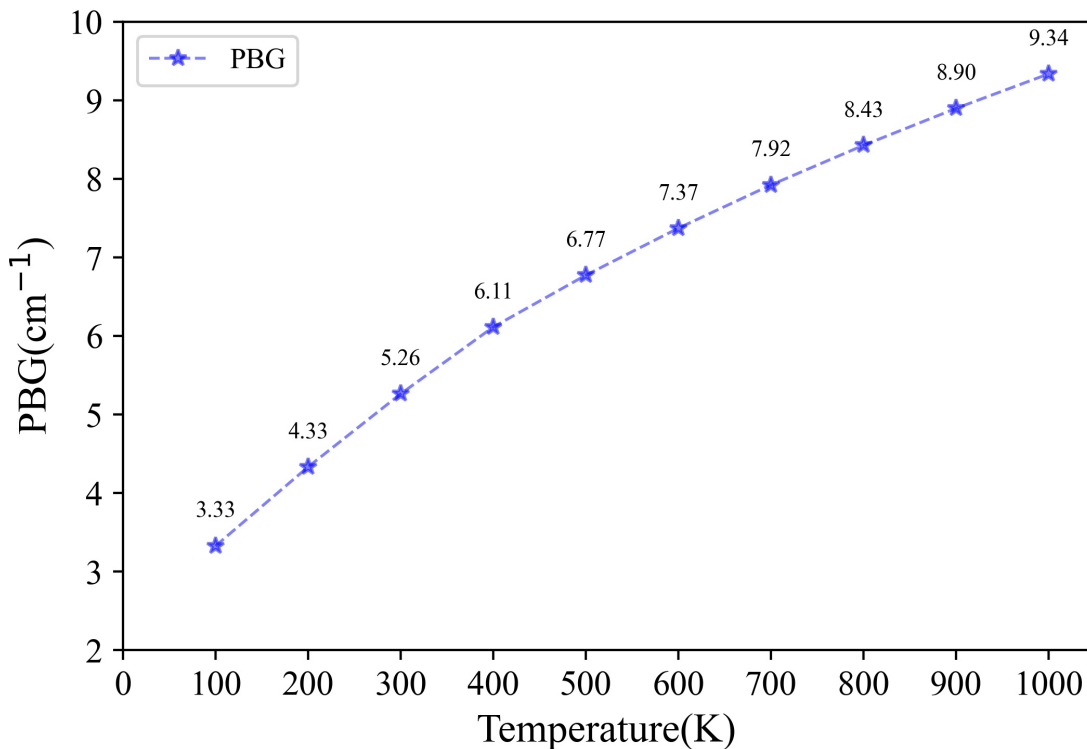

FIG. S1. The phonon band gap(PBG) of  $Cs_2Se$  at different temperature(K).

TABLE SII. The frequencies corresponding to the cumulative lattice thermal conductivity of 50%, 60%, 70%, 80%, and 90% are presented. Here,  $\omega(a, b)$  represents the frequency corresponding to the a(b)-direction and  $\omega(c)$  represents the frequency corresponding to the c-direction.

| Material           | Percentage | $\omega(a, b)$<br>cm <sup>-1</sup> | $\omega(c)$<br>cm <sup>-1</sup> |
|--------------------|------------|------------------------------------|---------------------------------|
| Cs <sub>2</sub> Se | 50%        | 26                                 | 21                              |
|                    | 60%        | 33                                 | 24                              |
|                    | 70%        | 41                                 | 28                              |
|                    | 80%        | 52                                 | 42                              |
|                    | 90%        | 63                                 | 58                              |
| Cs <sub>2</sub> Te | 50%        | 26                                 | 20                              |
|                    | 60%        | 32                                 | 25                              |
|                    | 70%        | 38                                 | 32                              |
|                    | 80%        | 46                                 | 50                              |
|                    | 90%        | 58                                 | 62                              |
| Rb <sub>2</sub> Se | 50%        | 30                                 | 26                              |
|                    | 60%        | 34                                 | 30                              |
|                    | 70%        | 46                                 | 36                              |
|                    | 80%        | 59                                 | 53                              |
|                    | 90%        | 70                                 | 74                              |
| Rb <sub>2</sub> Te | 50%        | 30                                 | 26                              |
|                    | 60%        | 34                                 | 30                              |
|                    | 70%        | 40                                 | 36                              |
|                    | 80%        | 50                                 | 49                              |
|                    | 90%        | 63                                 | 70                              |
